# Supplementary material
Source: publisher site journal article supplement (https://kjim.org/upload/media/kjim-2024-006-Supplementary-Table-2.pdf)
Supplement: Supplementary file 1 [file kjim-2024-006-Supplementary-Table-2.pdf]

**Supplementary Table 2. Summary of abdominal imaging studies**

| Variable                  | Total<br>(n = 553) | Intestinal BD with Gallstone<br>(n = 141) | Intestinal BD with renal stone<br>(n = 35) |
|---------------------------|--------------------|-------------------------------------------|--------------------------------------------|
| APCT                      | 396 (71.6)         | 107 (75.8)                                | 28 (80.0)                                  |
| Abdominal ultrasonography | 32 (5.7)           | 2 (1.4)                                   | 1 (2.8)                                    |
| APCT and ultrasonography  | 125 (22.6)         | 32 (22.6)                                 | 6 (17.1)                                   |

Values are presented as number (%).

BD, Behçet's disease; APCT, abdominal-pelvic computed tomography.
